# Supplementary material for: PMF-LP: the first 10 m plastic-mulched farmland distribution map (2019–2021) in the Loess Plateau of China generated using training sample generation and classifier transfer method
Source: Copernicus journal article supplement (doi:10.5194/essd-2024-372), 2024-10-11
Supplement: Supplementary file 1 [file essd-2024-372-supplement.pdf]

1 *Supplement of*

2 **PMF-LP: the first 10 m plastic-mulched farmland distribution map (2019-2021) in**  
3 **the Loess Plateau of China generated using training sample generation and**  
4 **classifier transfer method**

5 **Cheng Zhao et al.**

6 \* *Correspondence to:* Jianqiang He (jianqiang\_he@nwsuaf.edu.cn)

7 The copyright of individual parts of the supplement might differ from the article license.

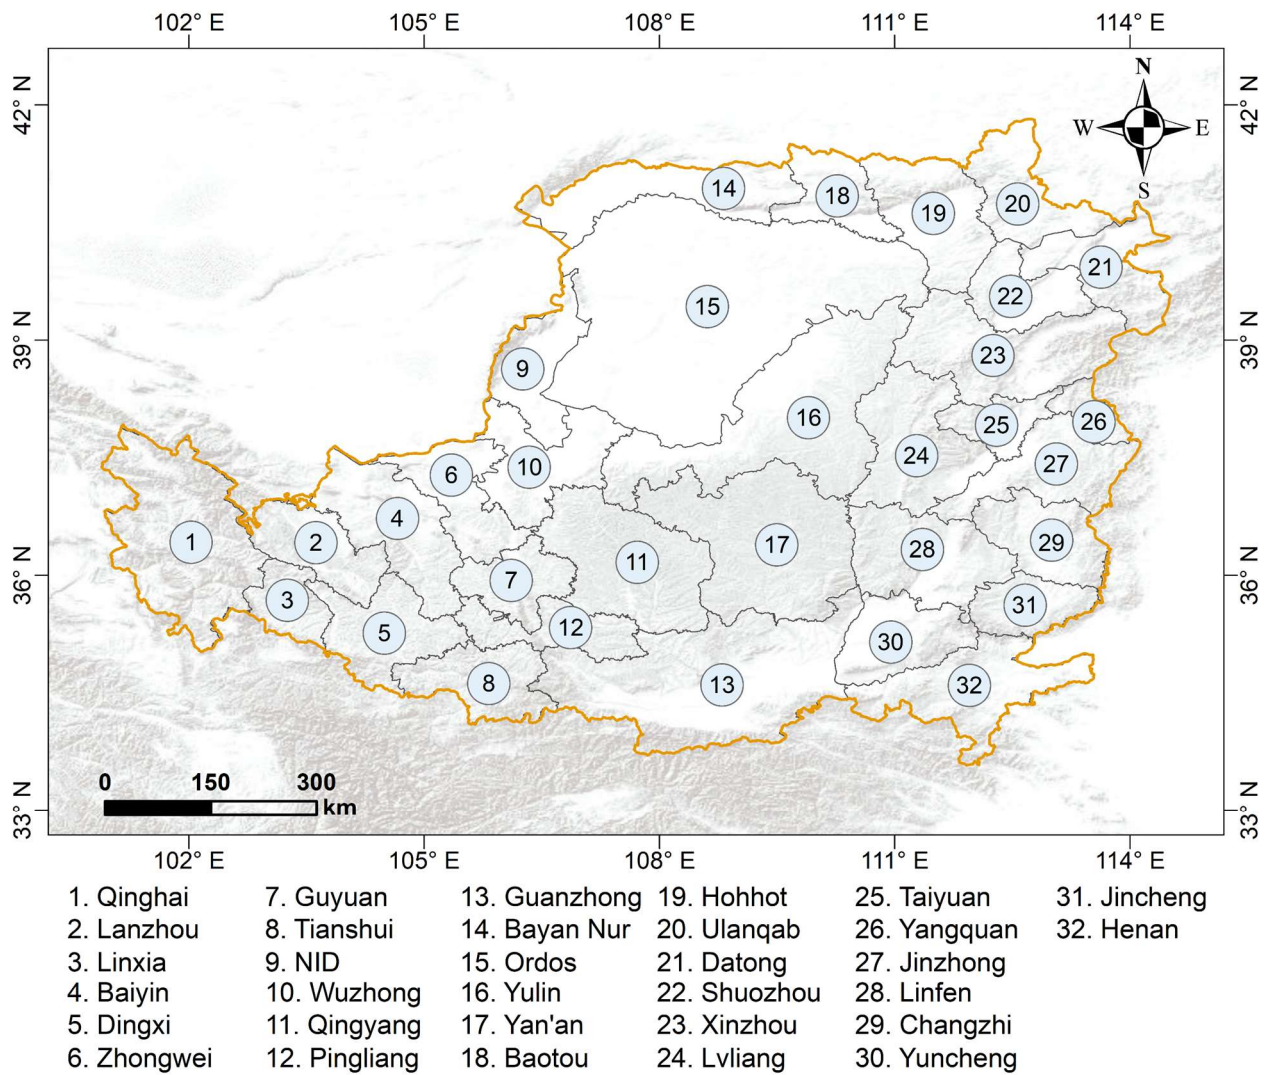

8  
9 **Figure. S1.** Distributions of the 32 mapping units in the Loess Plateau of China. To ensure the integrity of two-class samples  
10 (i.e., plastic-mulched farmland and Non-plastic-mulched farmland samples), some cities were merged into a single mapping  
11 unit, such as “1. Qinghai”, “9. NID (the Ningxia Irrigation District)”, “13. Guanzhong”, and “32. Henan”.

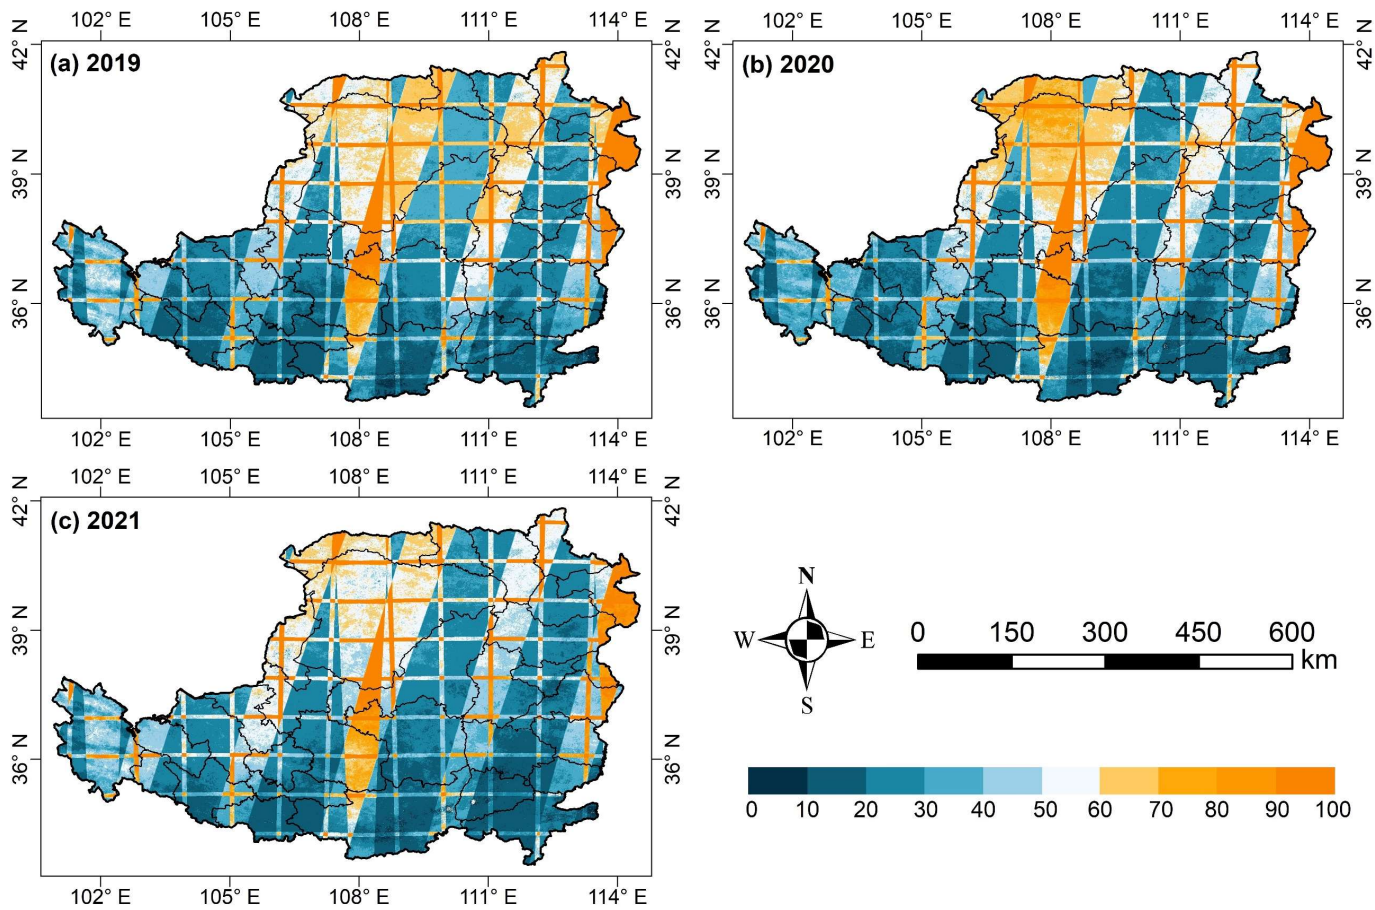

12 **Figure. S2.** Cloud-free Sentinel-2 observation counts at each pixel from March to October for the year 2019 (a), 2020 (b),  
 13 and 2021 (c) in the Loess Plateau of China.  
 14  
 15  
 16  
 17

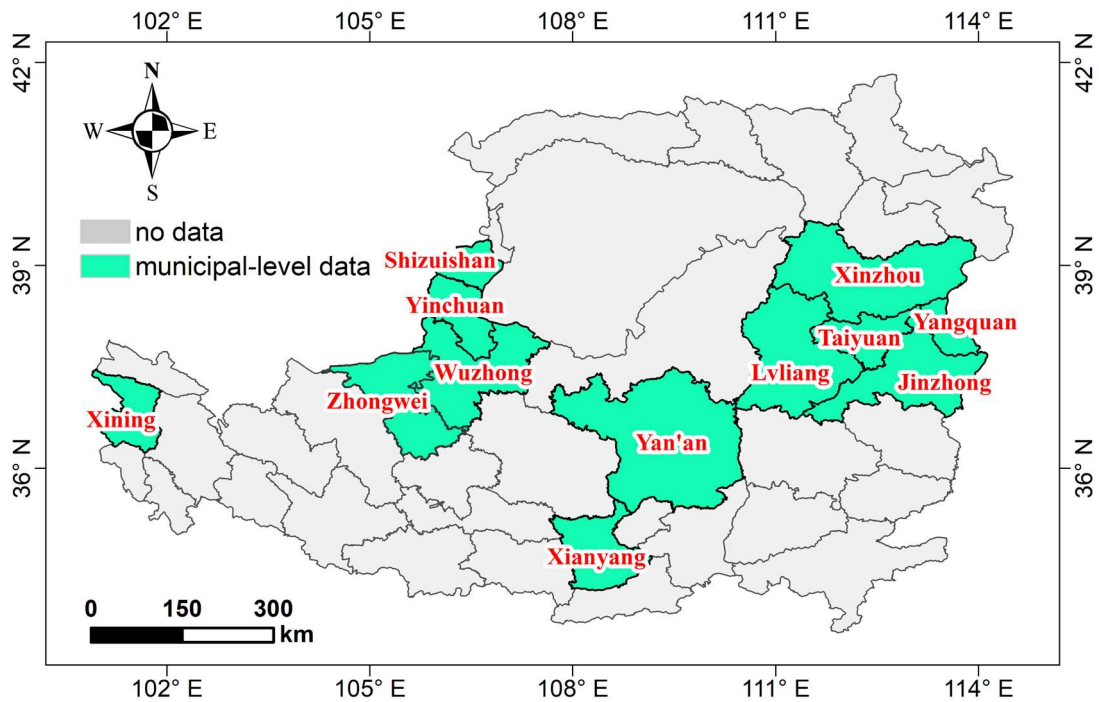

18 **Figure. S3.** Spatial distributions of the 12 cities with statistical data of plastic-mulched farmland areas in the Loess  
 19 Plateau.  
 20  
 21  
 22

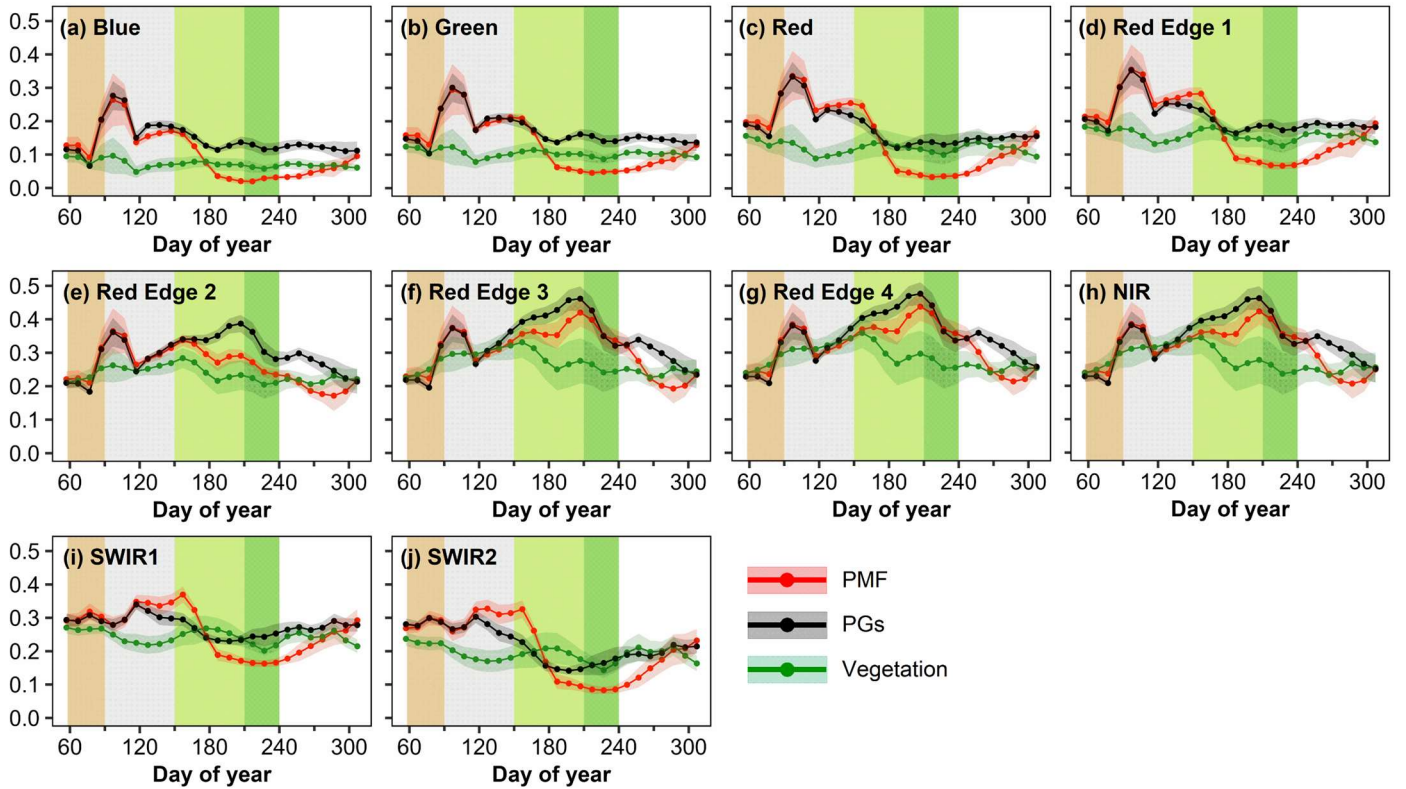

23

24 **Figure. S4.** Time series profiles of plastic-mulched farmland (PMF), plastic greenhouses (PGs), and vegetation in various  
 25 spectral bands of Sentinel-2. The red, gray, and blue buffers indicate one standard deviation. The brown, gray, yellowish-  
 26 green, and green rectangular areas denote the pre-mulching stage(PMS), mulching stage (MS), growth stage (GS), and  
 27 flourishing stage (FS) as defined in Section 3.1.2 of the manuscript.

28

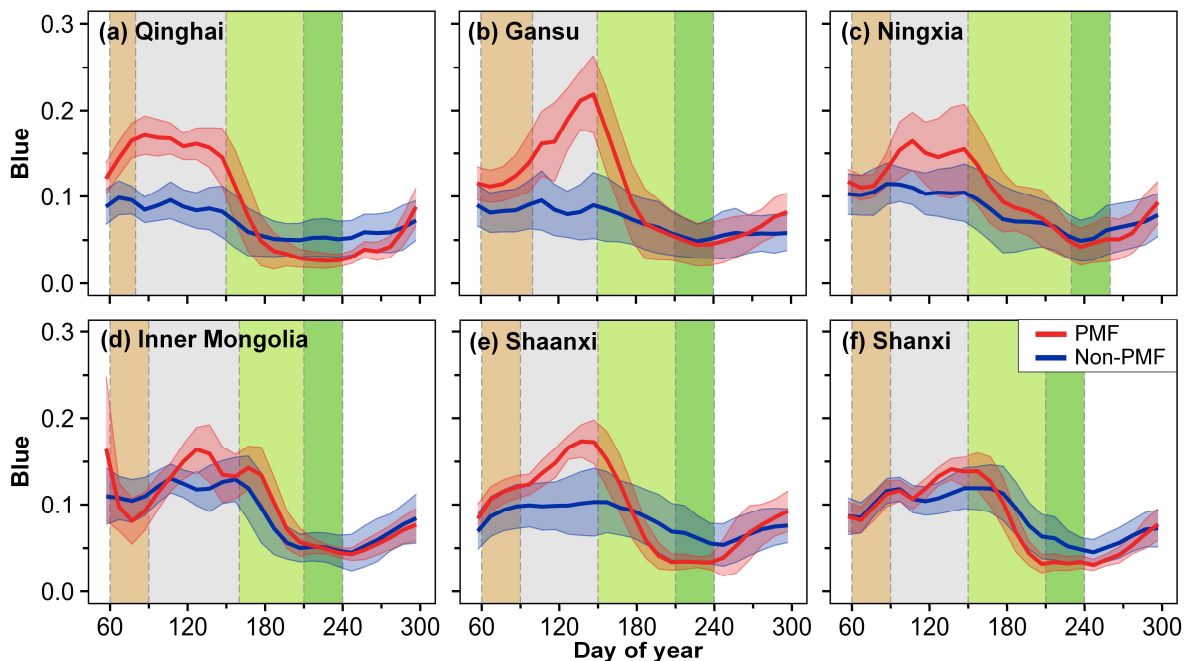

29

30 **Figure. S5.** Time series profiles of plastic-mulched farmland (PMF) and non-plastic-mulched farmland (Non-PMF) in the  
 31 Sentinel-2 blue band across the six provinces (i.e., Qinghai (a), Gansu (b), Ningxia (c), Inner Mongolia (d), Shaanxi (e),  
 32 Shanxi (f)) in the Loess Plateau of China. The red and blue buffers indicate one standard deviation. The brown, gray,  
 33 yellowish-green, and green rectangular areas denote the pre-mulching stage (PMS), mulching stage (MS), growing stage (GS),  
 34 and flourishing stage (FS) as defined in Section 3.1.2 of the manuscript, respectively.

35



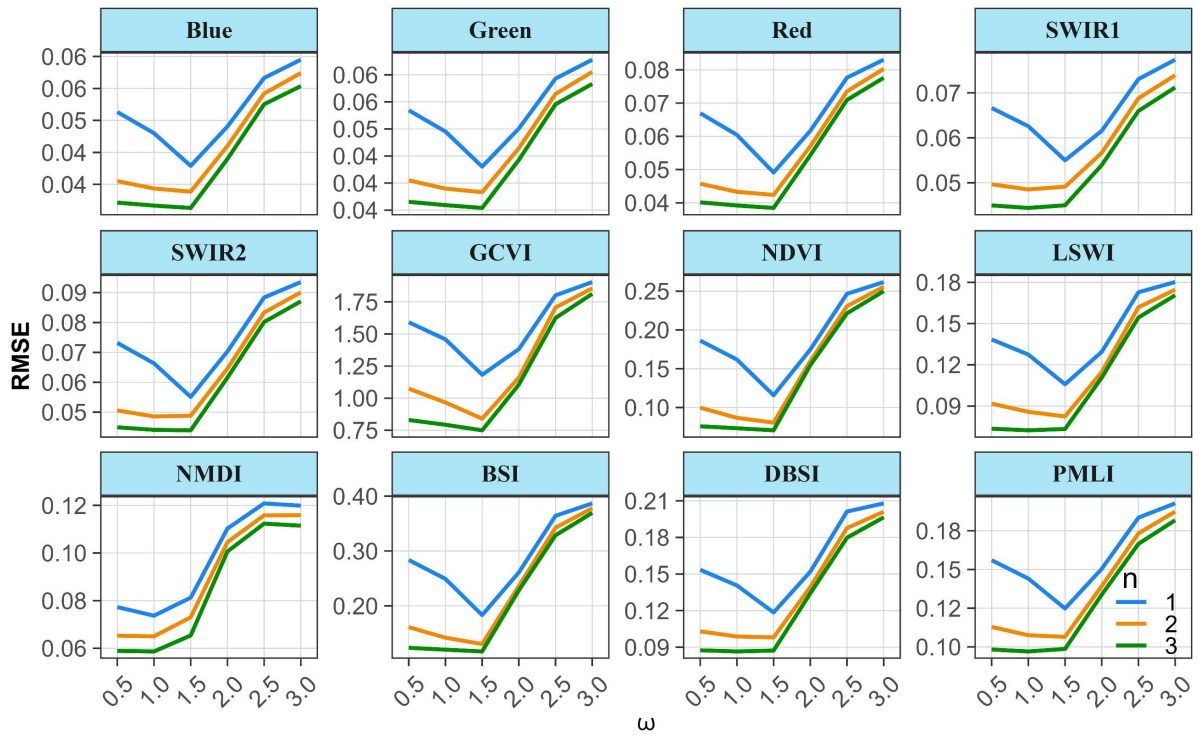

36

37 **Figure. S6.** Changes in the root mean square error (RMSE) across different spectral bands and vegetation indices as the  
 38 number of harmonic components ( $n$ ) and angular frequencies ( $\omega$ ) increases. The RMSE was calculated using the ground  
 39 reference samples collected from the representative rectangular regions (Fig. 1 (a)) in each province.

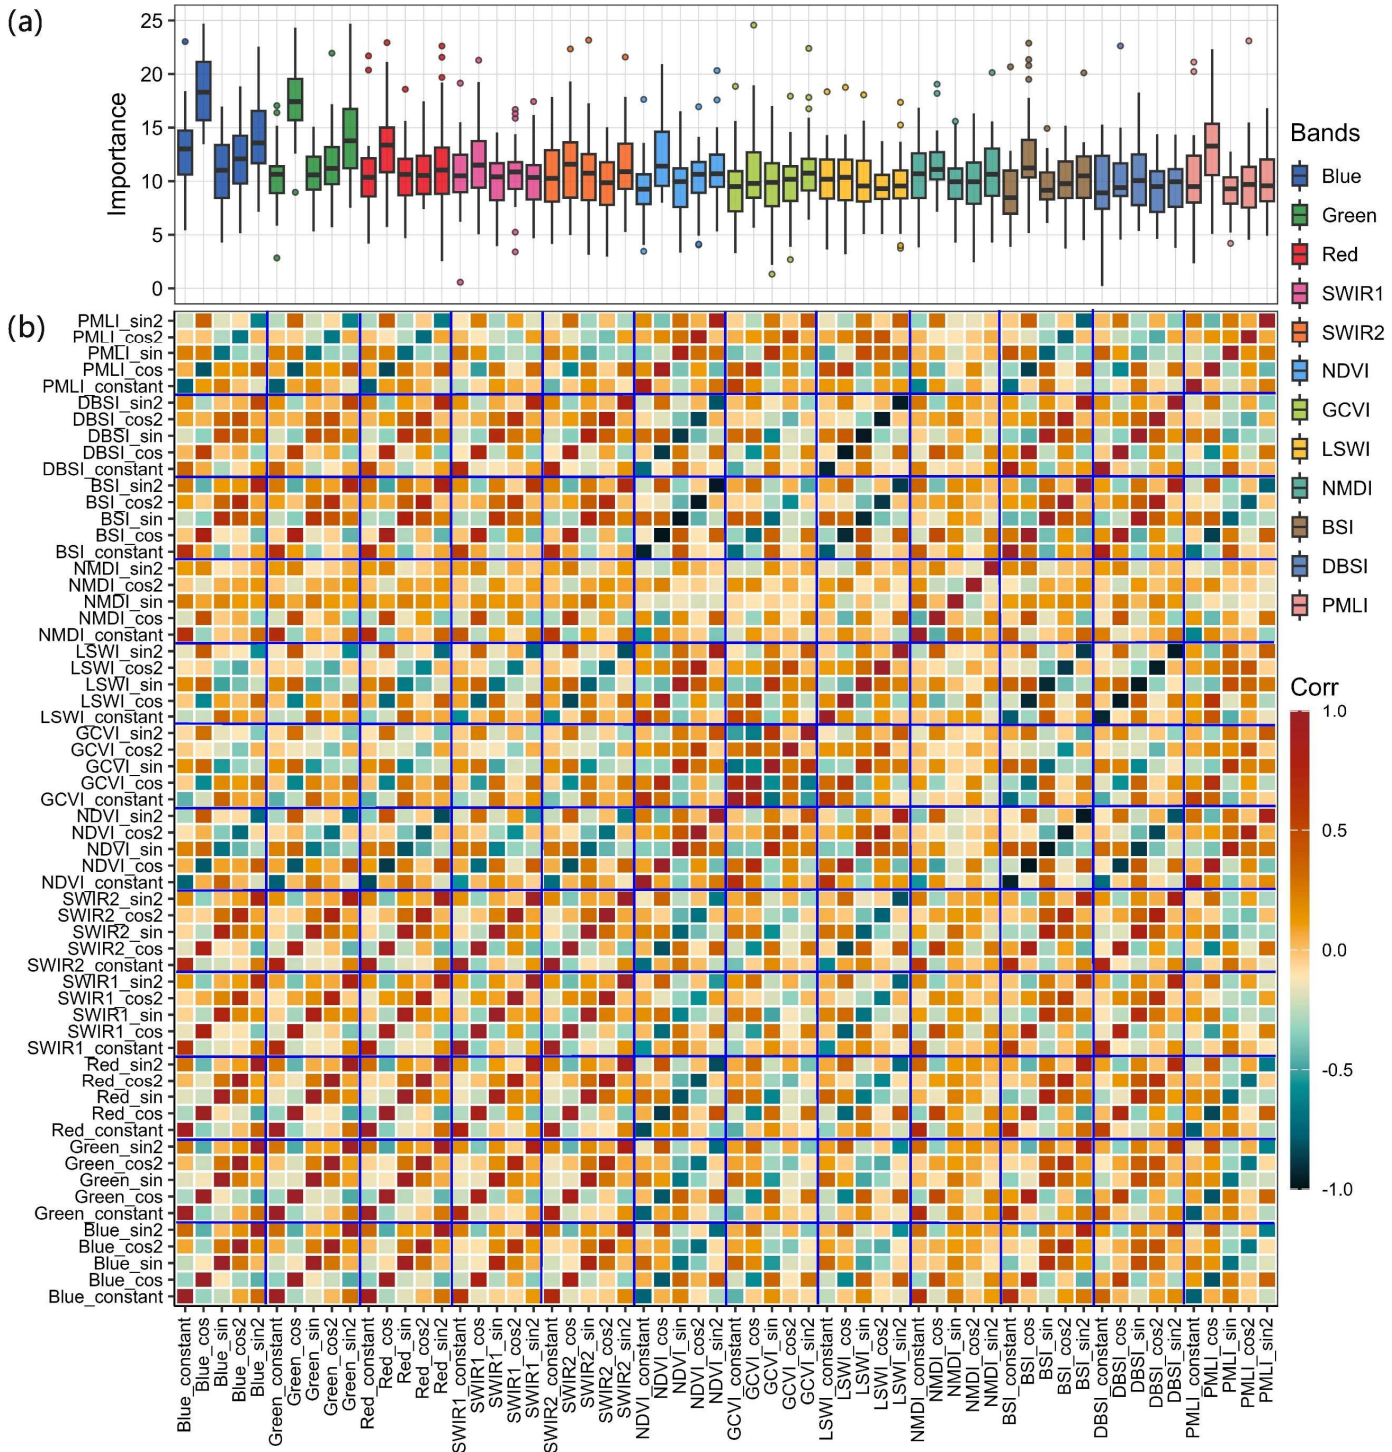

40  
 41 **Figure. S7.** Feature dimension reduction by combining feature correlation analysis and feature importance evaluation. (a)  
 42 Feature importance values based on the Gini impurity reduction calculated by the random forest classifiers trained in each  
 43 city in the Loess Plateau. Since the feature importance in each city is not comparable, we normalized the individual value by  
 44 dividing the total reduction in impurity over all features within each city and scaled them by multiplying 1000. (b) Correlation  
 45 matrix of 60 harmonic regression coefficients across the Loess Plateau in the year of 2020.

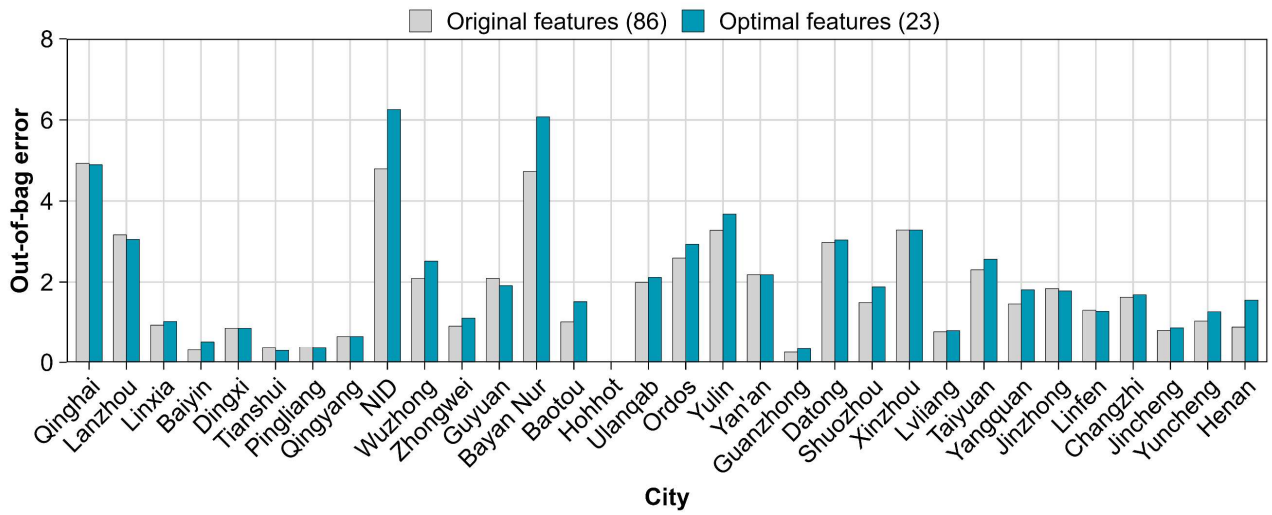

46  
47 **Figure. S8.** Accuracy comparison between the random forest classifiers trained on the 86 features (original features) and  
48 the 28 features (optimal features)  
49  
50  
51

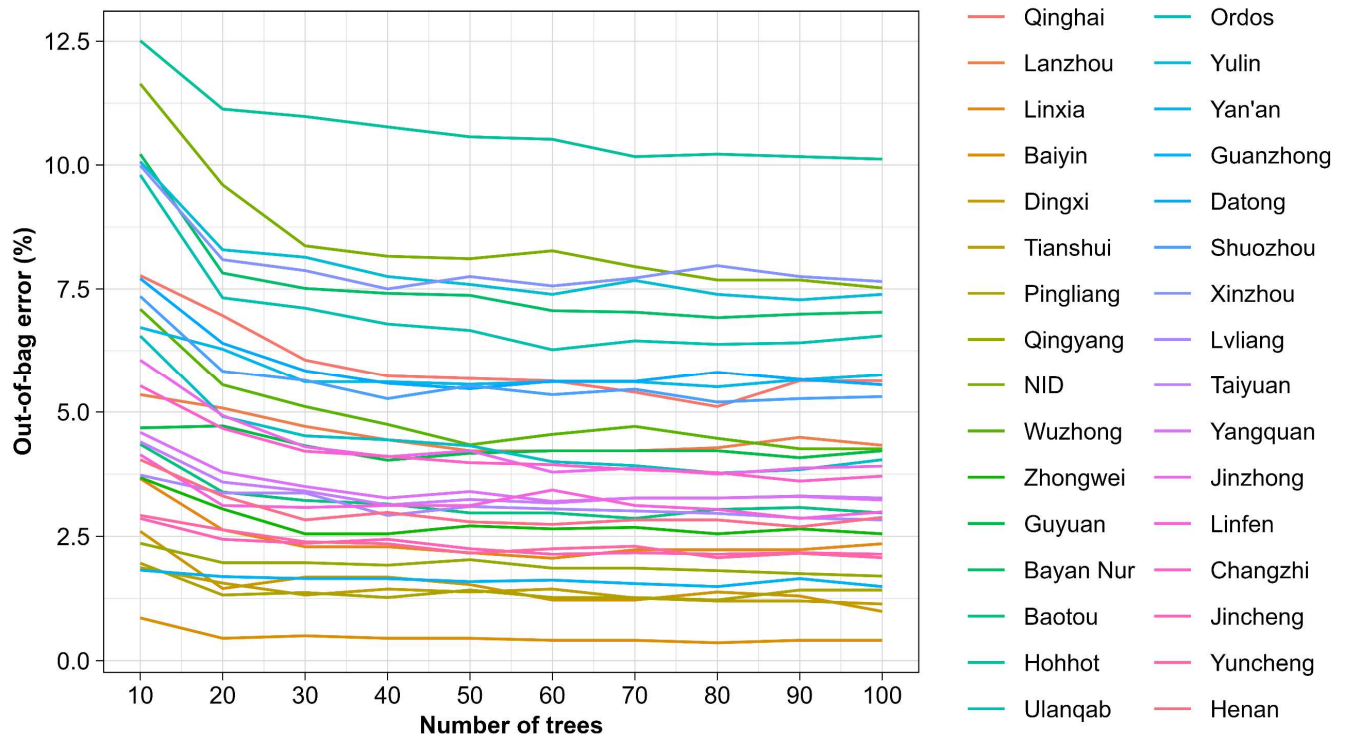

52  
53 **Figure. S9.** Changes in the out-of-bag errors calculated by the random forest classifiers trained in each mapping unit as the  
54 number of trees increases.  
55  
56



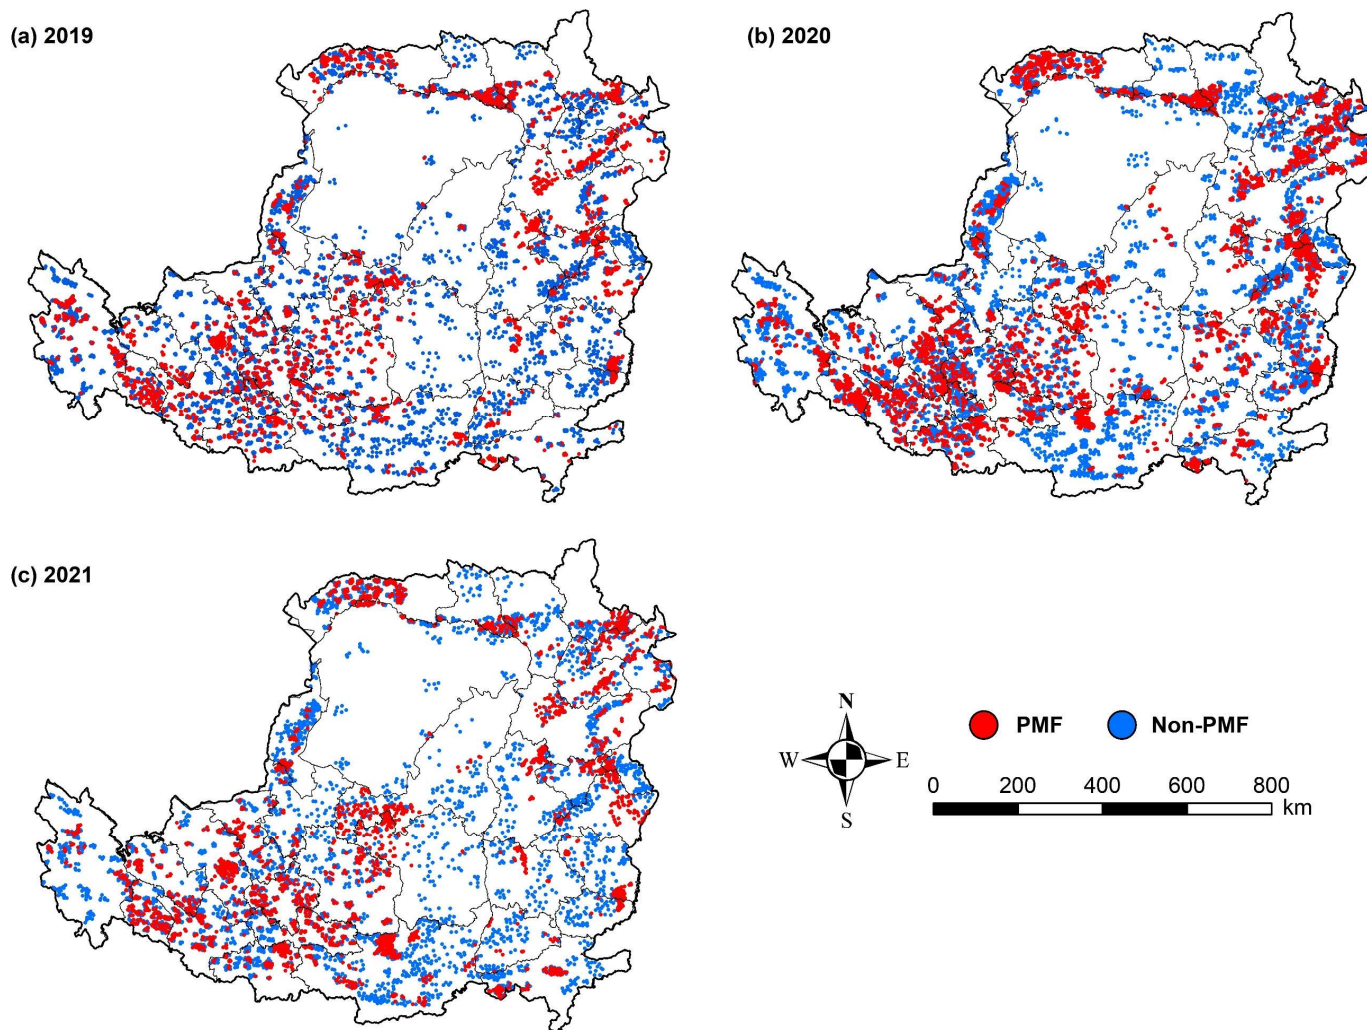

57  
58 **Figure. S10.** Distributions of the validation samples for the year 2019 (a), 2020 (b), and 2021(c) in the Loess Plateau.

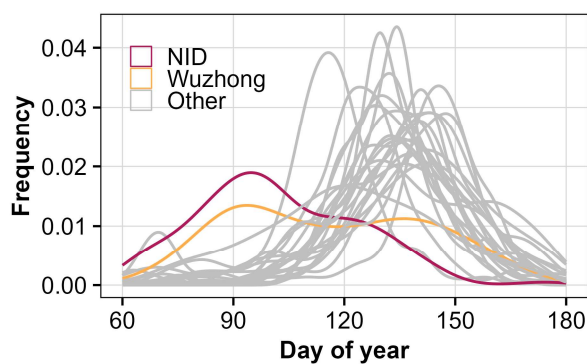

62  
63 **Figure. S11.** Sowing date distributions in cities across the Loess Plateau. The sowing dates were derived from the dates  
64 corresponding to the peak values of the harmonic regression curves in the Sentinel-2 blue band. The NID refers to the Ninxia  
65 Irrigation District as illustrate in Fig. S1.



69  
70  
71  
72  
73

**Table S1**

Statistical analysis results of the MBPMFI and BPMFI indices for plastic-mulched farmland (PMF) and non-plastic-mulched farmland (Non-PMF). Note that the PMF and Non-PMF samples for each province were collected from the rectangular regions in Fig. 1 (a) of the manuscript. Student's *t* test (two-tailed, unpaired) was used for the comparison between PMF and Non-PMF. \**p* < 0.05; \*\**p* < 0.01; and \*\*\**p* < 0.001.

| Location       | Metrics | <i>t</i> | <i>p</i> -value |
|----------------|---------|----------|-----------------|
| Qinghai        | MBPMFI  | -38.51   | 0.00***         |
|                | BPMFI   | -28.92   | 0.00***         |
| Gansu          | MBPMFI  | -66.53   | 0.00***         |
|                | BPMFI   | -49.00   | 0.00***         |
| Ningxia        | MBPMFI  | -50.85   | 0.00***         |
|                | BPMFI   | -40.30   | 0.00***         |
| Inner Mongolia | MBPMFI  | -53.88   | 0.00***         |
|                | BPMFI   | -55.32   | 0.00***         |
| Shaanxi        | MBPMFI  | -40.80   | 0.00***         |
|                | BPMFI   | -43.99   | 0.00***         |
| Shanxi         | MBPMFI  | -46.45   | 0.00***         |
|                | BPMFI   | -52.14   | 0.00***         |

74  
75

**Table S2**

Summary of the vegetation indices used for plastic-mulched farmland recognition in this study.

| Name                                             | Equation*                                                                                                                           |
|--------------------------------------------------|-------------------------------------------------------------------------------------------------------------------------------------|
| NDVI<br>(Normalized Difference Vegetation Index) | $\frac{\rho_{NIR} - \rho_{Red}}{\rho_{NIR} + \rho_{Red}}$                                                                           |
| GCVI<br>(Green Chlorophyll Vegetation Index)     | $\frac{\rho_{NIR}}{\rho_{Green}} - 1$                                                                                               |
| LSWI<br>(Land Surface Water Index)               | $\frac{\rho_{NIR} - \rho_{SWIR1}}{\rho_{NIR} + \rho_{SWIR1}}$                                                                       |
| NMDI<br>(Normalized Multi-band Drought Index)    | $\frac{\rho_{RE4} - (\rho_{SWIR1} - \rho_{SWIR2})}{\rho_{RE4} + (\rho_{SWIR1} - \rho_{SWIR2})}$                                     |
| BSI<br>(Bare Soil Index)                         | $\frac{(\rho_{SWIR2} + \rho_{Red}) - (\rho_{NIR} - \rho_{Blue})}{(\rho_{SWIR2} + \rho_{Red}) + (\rho_{NIR} - \rho_{Blue})}$         |
| DBSI<br>(Dry Bareness Soil Index)                | $\frac{(\rho_{SWIR1} - \rho_{Green})}{(\rho_{SWIR1} + \rho_{Green})} - \frac{(\rho_{NIR} - \rho_{Red})}{(\rho_{NIR} + \rho_{Red})}$ |
| PMLI<br>(Plastic-mulched Landcover Index)        | $\frac{\rho_{SWIR1} - \rho_{Red}}{\rho_{SWIR1} + \rho_{Red}}$                                                                       |

78  
79  
80  
81

\*  $\rho_{blue}$ ,  $\rho_{green}$ ,  $\rho_{red}$ ,  $\rho_{nir}$ ,  $\rho_{RE4}$ ,  $\rho_{SWIR1}$ , and  $\rho_{SWIR2}$  represent the Sentinel-2 reflectance in the blue band (496 nm), green band (560 nm), red band (665 nm), near-infrared band (833 nm), red-edge 4 band (864 nm), shortwave-infrared band 1 (1610 nm), and shortwave-infrared band 2 (2185 nm), respectively.

**Table S3**

Number of ground truth samples collected from visual interpretation of Sentinel-2 true-color composite images and Google Earth high-resolution images in the years of 2019, 2020, and 2021. PMF: Plastic-mulched Farmland; Non-PMF: Non-plastic-mulched Farmland.

| Year | PMF  | Non-PMF |
|------|------|---------|
| 2019 | 3099 | 3992    |
| 2020 | 5342 | 6798    |
| 2021 | 2923 | 3791    |

**Table S4**

Accuracy assessment of the plastic-mulched farmland map for each city in the Loess Plateau in 2019 based on the validation samples. The PA, UA, F1, and OA are abbreviations of the producer accuracy, user accuracy, F1-score, and overall accuracy, respectively.

| City      | PA   | UA   | F1   | OA   |
|-----------|------|------|------|------|
| Qinghai   | 0.77 | 0.82 | 0.80 | 0.86 |
| Lanzhou   | 0.86 | 0.94 | 0.90 | 0.90 |
| Linxia    | 0.94 | 0.90 | 0.92 | 0.92 |
| Baiyin    | 0.97 | 0.76 | 0.85 | 0.83 |
| Dingxi    | 1.00 | 0.76 | 0.86 | 0.84 |
| Tianshui  | 0.78 | 0.92 | 0.86 | 0.89 |
| Pingliang | 0.98 | 0.89 | 0.94 | 0.93 |
| Qingyang  | 0.99 | 0.80 | 0.89 | 0.87 |
| NID       | 0.65 | 0.63 | 0.64 | 0.73 |
| Wuzhong   | 0.77 | 0.75 | 0.76 | 0.86 |
| Zhongwei  | 0.93 | 0.70 | 0.80 | 0.79 |
| Guyuan    | 0.95 | 0.81 | 0.87 | 0.86 |
| Bayan Nur | 0.76 | 0.77 | 0.77 | 0.75 |
| Baotou    | 0.78 | 0.84 | 0.81 | 0.82 |
| Hohhot    | 0.43 | 0.92 | 0.58 | 0.74 |
| Ulanqab   | 0.95 | 0.89 | 0.92 | 0.92 |
| Ordos     | 0.77 | 0.74 | 0.75 | 0.80 |
| Yulin     | 0.98 | 0.76 | 0.86 | 0.84 |
| Yan'an    | 0.99 | 0.61 | 0.75 | 0.77 |
| Guanzhong | 0.65 | 0.65 | 0.65 | 0.80 |
| Datong    | 0.88 | 0.82 | 0.85 | 0.86 |
| Shuozhou  | 0.72 | 0.85 | 0.78 | 0.81 |
| Xinzhou   | 0.91 | 0.85 | 0.88 | 0.88 |
| Lvliang   | 0.91 | 0.82 | 0.86 | 0.88 |
| Taiyuan   | 0.95 | 0.80 | 0.87 | 0.85 |
| Yangquan  | 1.00 | 0.74 | 0.85 | 0.86 |
| Jinzhong  | 0.90 | 0.86 | 0.88 | 0.88 |
| Linfen    | 0.84 | 0.75 | 0.79 | 0.84 |
| Changzhi  | 0.96 | 0.74 | 0.83 | 0.79 |
| Jincheng  | 0.90 | 0.73 | 0.81 | 0.85 |
| Yuncheng  | 0.83 | 0.93 | 0.87 | 0.92 |
| Henan     | 0.84 | 0.84 | 0.84 | 0.86 |

94  
95  
96  
97

**Table S5**

Accuracy assessment of the plastic-mulched farmland map for each city in the Loess Plateau in 2020 based on the validation samples. The PA, UA, F1, and OA are abbreviations of the producer accuracy, user accuracy, F1-score, and overall accuracy, respectively.

| City      | PA   | UA   | F1   | OA   |
|-----------|------|------|------|------|
| Qinghai   | 0.88 | 0.79 | 0.84 | 0.88 |
| Lanzhou   | 0.94 | 0.94 | 0.94 | 0.94 |
| Linxia    | 0.91 | 0.92 | 0.92 | 0.92 |
| Baiyin    | 0.96 | 0.89 | 0.92 | 0.92 |
| Dingxi    | 0.94 | 0.78 | 0.85 | 0.85 |
| Tianshui  | 0.75 | 0.97 | 0.84 | 0.86 |
| Pingliang | 0.97 | 0.87 | 0.92 | 0.91 |
| Qingyang  | 0.98 | 0.77 | 0.86 | 0.84 |
| NID       | 0.69 | 0.81 | 0.75 | 0.86 |
| Wuzhong   | 0.93 | 0.84 | 0.88 | 0.92 |
| Zhongwei  | 0.89 | 0.91 | 0.90 | 0.91 |
| Guyuan    | 1.00 | 0.68 | 0.81 | 0.81 |
| Bayan Nur | 0.80 | 0.99 | 0.88 | 0.90 |
| Baotou    | 0.83 | 0.68 | 0.75 | 0.81 |
| Hohhot    | 0.55 | 0.74 | 0.63 | 0.80 |
| Ulanqab   | 0.83 | 0.89 | 0.86 | 0.89 |
| Ordos     | 0.90 | 0.61 | 0.73 | 0.78 |
| Yulin     | 0.99 | 0.80 | 0.89 | 0.88 |
| Yan'an    | 0.83 | 0.92 | 0.87 | 0.88 |
| Guanzhong | 0.78 | 0.78 | 0.78 | 0.85 |
| Datong    | 0.91 | 0.83 | 0.87 | 0.86 |
| Shuozhou  | 0.82 | 0.94 | 0.88 | 0.88 |
| Xinzhou   | 0.91 | 0.78 | 0.84 | 0.83 |
| Lvliang   | 0.83 | 0.96 | 0.89 | 0.91 |
| Taiyuan   | 0.86 | 0.80 | 0.83 | 0.82 |
| Yangquan  | 0.98 | 0.80 | 0.88 | 0.92 |
| Jinzhong  | 0.88 | 0.96 | 0.92 | 0.92 |
| Linfen    | 0.68 | 0.89 | 0.77 | 0.81 |
| Changzhi  | 0.93 | 0.92 | 0.92 | 0.92 |
| Jincheng  | 0.84 | 0.96 | 0.89 | 0.93 |
| Yuncheng  | 0.74 | 0.78 | 0.76 | 0.87 |
| Henan     | 0.87 | 0.86 | 0.87 | 0.87 |

98  
99  
100  
101  
102  
103  
104  
105  
106  
107  
108  
109  
110  
111  
112



113  
114  
115  
116

**Table S6**

Accuracy assessment of the plastic-mulched farmland map for each city in the Loess Plateau in 2021 based on the validation samples. The PA, UA, F1, and OA are abbreviations of the producer accuracy, user accuracy, F1-score, and overall accuracy, respectively.

| City      | PA   | UA   | F1   | OA   |
|-----------|------|------|------|------|
| Qinghai   | 0.66 | 0.56 | 0.60 | 0.79 |
| Lanzhou   | 0.93 | 0.94 | 0.93 | 0.94 |
| Linxia    | 0.83 | 0.91 | 0.87 | 0.88 |
| Baiyin    | 0.98 | 0.76 | 0.86 | 0.84 |
| Dingxi    | 0.89 | 0.74 | 0.81 | 0.81 |
| Tianshui  | 0.70 | 0.89 | 0.78 | 0.83 |
| Pingliang | 0.95 | 0.78 | 0.86 | 0.85 |
| Qingyang  | 0.98 | 0.76 | 0.85 | 0.85 |
| NID       | 0.75 | 0.81 | 0.78 | 0.86 |
| Wuzhong   | 0.78 | 0.87 | 0.82 | 0.89 |
| Zhongwei  | 0.95 | 0.84 | 0.89 | 0.88 |
| Guyuan    | 0.69 | 0.82 | 0.75 | 0.75 |
| Bayan Nur | 0.76 | 0.84 | 0.80 | 0.82 |
| Baotou    | 0.81 | 0.67 | 0.73 | 0.74 |
| Hohhot    | 0.57 | 0.74 | 0.64 | 0.81 |
| Ulanqab   | 0.81 | 0.87 | 0.84 | 0.85 |
| Ordos     | 0.91 | 0.70 | 0.79 | 0.86 |
| Yulin     | 0.86 | 0.70 | 0.77 | 0.76 |
| Yan'an    | 0.92 | 0.71 | 0.80 | 0.79 |
| Guanzhong | 0.77 | 0.80 | 0.78 | 0.84 |
| Datong    | 0.43 | 0.94 | 0.60 | 0.69 |
| Shuozhou  | 0.87 | 0.87 | 0.87 | 0.87 |
| Xinzhou   | 0.90 | 0.67 | 0.77 | 0.72 |
| Lvliang   | 0.95 | 0.74 | 0.83 | 0.84 |
| Taiyuan   | 0.99 | 0.65 | 0.78 | 0.72 |
| Yangquan  | 1.00 | 0.54 | 0.70 | 0.66 |
| Jinzhong  | 0.97 | 0.77 | 0.86 | 0.81 |
| Linfen    | 1.00 | 0.63 | 0.77 | 0.79 |
| Changzhi  | 0.99 | 0.69 | 0.81 | 0.80 |
| Jincheng  | 1.00 | 0.85 | 0.92 | 0.92 |
| Yuncheng  | 0.70 | 0.61 | 0.65 | 0.84 |
| Henan     | 0.95 | 0.84 | 0.89 | 0.91 |

117
